# Supplementary material
Source: Springer Nature journal article supplement (https://www.springermedizin.de/resource/supplementary/12916_2013_837_MOESM1_ESM.pdf/9598422)
Supplement: MOESM1 [file 9598422]

Studies identified using the MEDLINE, EMBASE, CINAHL, National Guideline Clearinghouse, NICE, SIGN, and GIN International Guideline Library databases (n = 1203)

Studies excluded after reading titles and abstracts (n = 1051)

Search for potentially relevant studies (n = 152)

Studies excluded  
Irrelevant topic (n=62)

Guidelines retrieved for further evaluation (n = 90)

Guidelines excluded

- Non English (n = 17)
- Non-thyroid cancer (n = 2)
- Procedure guidelines (n = 36)
- Non-original guidelines (n = 11)
- Not most recent version (n=12)
- Duplicate publication (n=2)

Included guidelines (n = 10)
